# Supplementary material for: Developmental and stress regulation on expression of a novel miRNA, Fan-miR73, and its target ABI5 in strawberry
Source: PubMed Central journal article supplement (PMC4914977; doi:10.1038/srep28385), 2016-06-21
Supplement: srep28385-s1.pdf [file srep28385-s1.pdf]

## Supplementary information for

Developmental and stress regulation on expression of a novel

miRNA, Fan-miR73, and its target ABI5 in strawberry

Dongdong Li, Wangshu Mou, Zisheng Luo, Li Li, Jarukitt Limwachiranon, Linchun Mao, Tiejun Ying

**Table S1: Primers used in this study.**

| <b>Primer</b>              | <b>Sequence 5'-3'</b>                                      |
|----------------------------|------------------------------------------------------------|
| <b>Fan-miR37-RT</b>        | <b>GTCGTATCCAGTGCAGGGTCCGAGGTATTCCGACTGGATACGACgaaaga</b>  |
| <b>Fan-miR37-F</b>         | <b>CCAGCTTGATCATCTTCC</b>                                  |
| <b>Fan-miR37-R</b>         | <b>AGCAGGGTCCGAGGTATTC</b>                                 |
| <b>5.8S-RT</b>             | <b>GTCGTATCCAGTGCAGGGTCCGAGGTATTCCGACTGGATACGACggtgtga</b> |
| <b>5.8s-F</b>              | <b>CACCTGTTACCATCCCGA</b>                                  |
| <b>5.8s-R</b>              | <b>AGCAGGGTCCGAGGTATTC</b>                                 |
| <b>Northern blot probe</b> | <b>GAAAGATGGAAGATGATCAAGG/3Dig_N/</b>                      |
| <b>RACE Oligo-adaptor</b>  | <b>CGACTGGAGCACGAGGACACTGACATGGACTGAAGGAGTAGAAA</b>        |
| <b>RACE-FP1</b>            | <b>GGTGTAGGATTCCGGTTTCAGCA</b>                             |
| <b>RACE-FP2</b>            | <b>GAAGTTGCAAAGCTAAAAGAGGAGAA</b>                          |
| <b>RACE-RP1</b>            | <b>CCTGCTCGCCGATCCCCATA</b>                                |
| <b>RACE-RP2</b>            | <b>CTACAGCACAAAGACACATGATCCTTA</b>                         |
| <b>NCED1-FP</b>            | <b>ACGACTTCGCCATTACCG</b>                                  |
| <b>NCED1-RP</b>            | <b>AGCATCGCTCGCATTCT</b>                                   |
| <b>NCED2-FP</b>            | <b>TACGGGGACAGGAAGTTCGGTG</b>                              |
| <b>NCED2-RP</b>            | <b>TCAAACCTCACGGCGTTCACAATCT</b>                           |
| <b>CYP707A1-FP</b>         | <b>CTGTGACCTCGGAGTCGTGGG</b>                               |
| <b>CYP707A1-RP</b>         | <b>TCCTCAGTTCTTCTTTGTAGCGGGT</b>                           |
| <b>PYR1-FP</b>             | <b>AAACCTTGTTCCGCTCCT</b>                                  |
| <b>PYR1-RP</b>             | <b>CAATGGCAATCTCCCTCC</b>                                  |
| <b>ABI1-FP</b>             | <b>GTCGTGGCAAACAACCTG</b>                                  |
| <b>ABI1-RP</b>             | <b>TTCCACTGTATGACCTTCCCT</b>                               |
| <b>SnRK2.2-FP</b>          | <b>GCACTTCCGTCCAAGAGTG</b>                                 |
| <b>SnRK2.2-RP</b>          | <b>AGGATATGTAGTGCTGGTAGATT</b>                             |
| <b>ABI5-FP</b>             | <b>GGAGCTGGCAATGGTCCG</b>                                  |
| <b>ABI5-RP</b>             | <b>AGGCCCGCCTTTCCTT</b>                                    |
| <b>Actin-FP</b>            | <b>TGGGTTTGCTGGAGATGAT</b>                                 |
| <b>Actin-RP</b>            | <b>CAGTAGGAGAACTGGGTGC</b>                                 |
